# Supplementary material for: Evaluation of Loco-Regional Skin Toxicity Induced by an In Situ Forming Depot after a Single Subcutaneous Injection at Different Volumes and Flow Rates in Göttingen Minipigs
Source: MDPI journal article supplement (doi:10.3390/ijms22179250), 2021-08-26
Supplement: s1 [file s1]

## ELECTRONIC SUPPLEMENTARY INFORMATION

### Evaluation of loco-regional skin toxicity induced by an *in situ* forming depot after a single subcutaneous injection at different volumes and flow rates in Göttingen minipigs

Charlotte Peloso<sup>1</sup>, Anne-Pascale Trichet<sup>1</sup>, Jacques Descotes<sup>2</sup>, Joël Richard<sup>1</sup>, Christophe Roberge<sup>1</sup> and Adolfo Lopez-Noriega<sup>1\*</sup>

\*Corresponding author: [adolfo.lopeznoriega@medincell.com](mailto:adolfo.lopeznoriega@medincell.com)

<sup>1</sup>MedinCell, 3 rue des frères Lumière, 34830 Jacou, France

<sup>2</sup>ImmunoSafe Consultance, 120 Chemin des Bouleaux, 38480 Saint Jean d'Avelanne, France

Figure S 1: Viscosity behavior of the test item at batch characterization (n = 3).

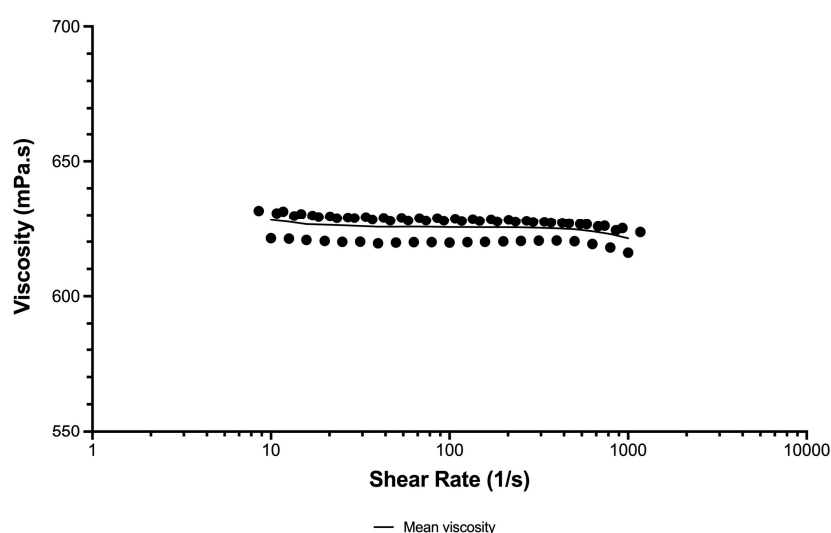

Figure S 2: Representative images of injection sites from the 0.2 mL treated group along the study

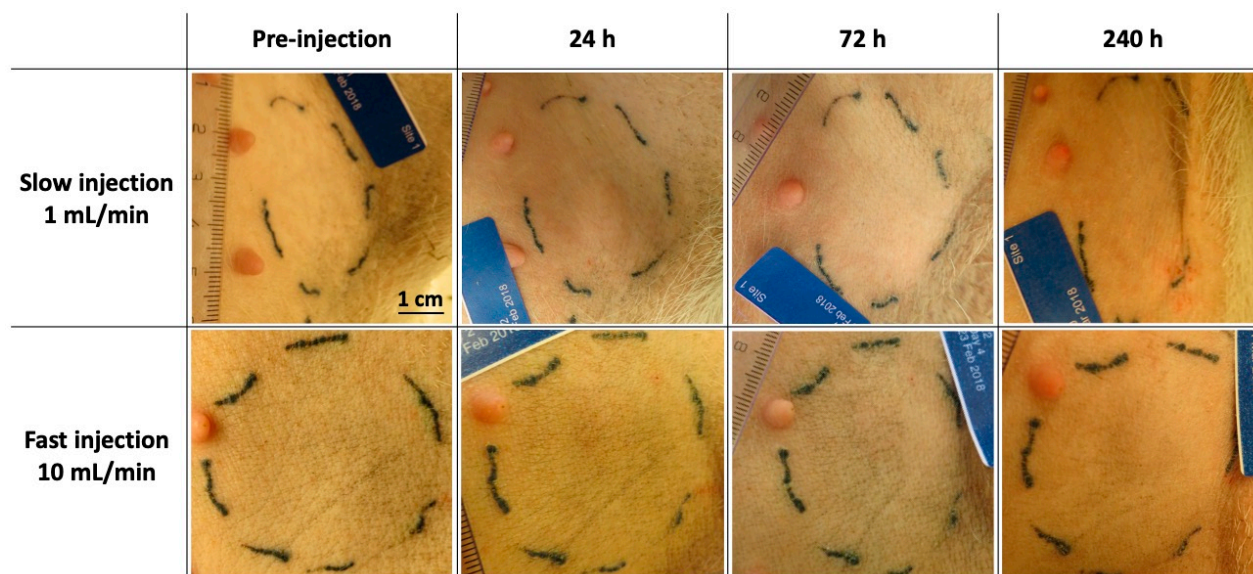

Figure S 3: Representative ultrasound images of A) 0.2 mL test item and B) 1 mL test item injection over the course of the study. Images were acquired along the transverse (1) sagittal (2) planes, at frequencies ranging from 13 to 15 MHz. Bolus (*i.e.* depot) are highlighted in red post-injection and indicated by an arrow at later time points.

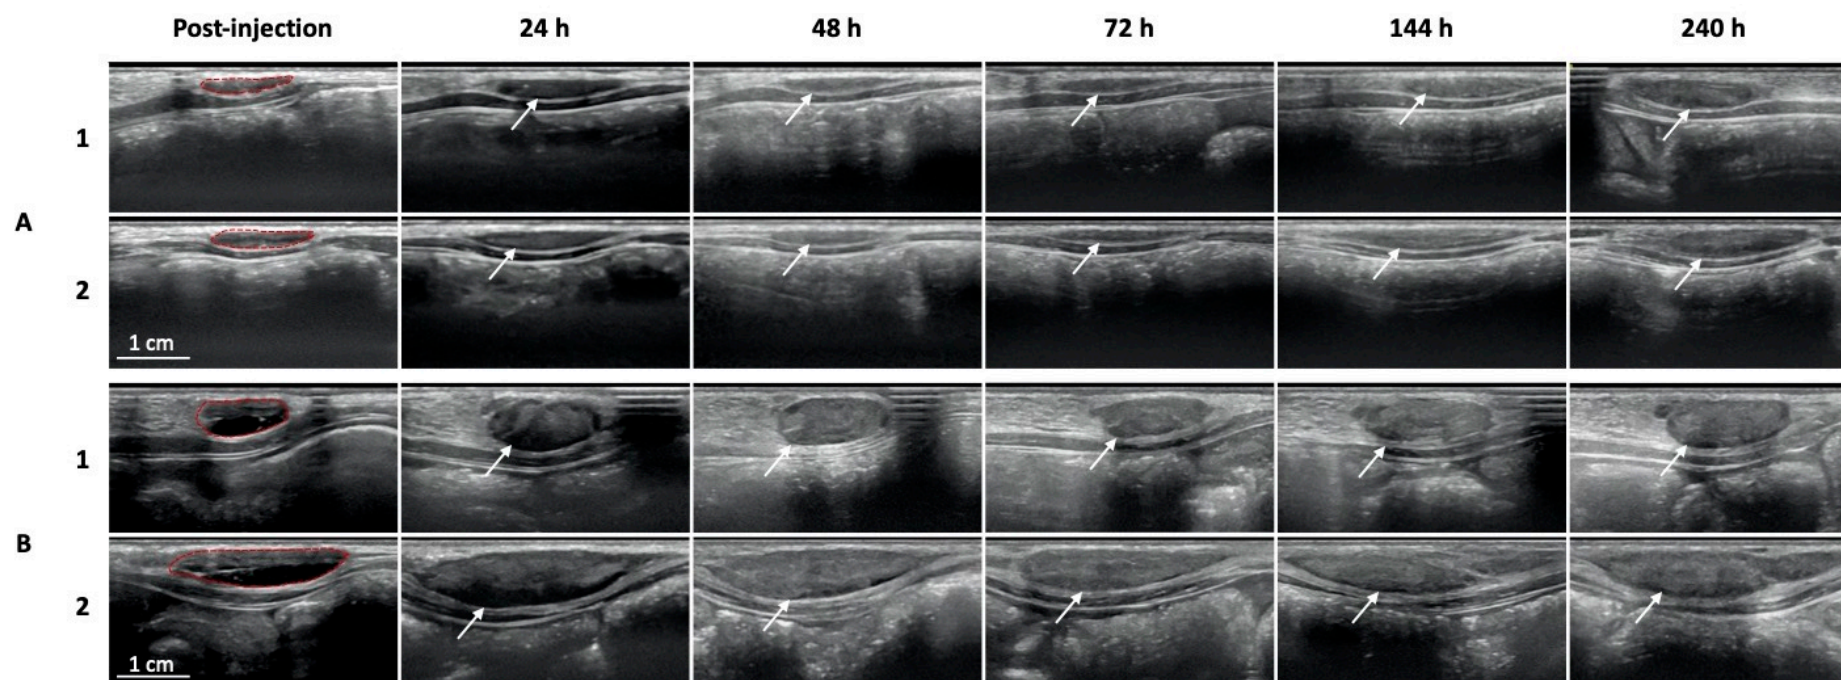

Table S 1: Histopathology grading of each injection sites involved in the study. F: focal; M: multifocal; D: diffuse; P: present. 1: minimal; 2: mild; 3: moderate; 4: marked.

| Treatment                   | Necropsy time point | Animal # | Injection flow rate (mL/min) | Cavity | Pseudocyst | Nodule | Mixed inflammatory cell infiltration | FBGC | Hemorrhage | Necrosis | Chronic inflammation |
|-----------------------------|---------------------|----------|------------------------------|--------|------------|--------|--------------------------------------|------|------------|----------|----------------------|
| Group 1<br>0.2 mL test item | 72 h                | 1        | 1                            | P      |            |        |                                      |      |            |          |                      |
|                             |                     |          | 10                           |        | P          |        |                                      | 1    |            |          |                      |
|                             |                     | 2        | 1                            |        | P          |        |                                      | 1    |            |          |                      |
|                             | 240 h               | 3        | 10                           |        | P          |        | 2M                                   | 1    |            |          |                      |
|                             |                     |          | 1                            |        | P          |        |                                      | 3    |            |          | 3D                   |
|                             |                     | 4        | 10                           |        | P          |        |                                      | 3    |            |          |                      |
| Group 2<br>1 mL test item   | 72 h                | 5        | 1                            |        | P          |        |                                      |      |            |          |                      |
|                             |                     |          | 10                           |        | P          |        | 1D                                   |      | 1M         |          |                      |
|                             |                     | 6        | 1                            |        | P          |        | 2D                                   | 1    |            |          | 1F                   |
|                             | 240 h               | 7        | 10                           |        | P          |        | 1D                                   |      | 1M         |          |                      |
|                             |                     |          | 1                            |        | P          |        |                                      | 3    |            |          |                      |
|                             |                     | 8        | 10                           |        | P          |        |                                      | 3    |            |          |                      |
